# Supplementary material
Source: PubMed Central journal article supplement (PMC9426671)
Supplement: ehp10570.smcontents.508.pdf [file ehp10570.smcontents.508.pdf]

**Note to readers with disabilities:** *EHP* strives to ensure that all journal content is accessible to all readers. However, some figures and Supplemental Material published in *EHP* articles may not conform to [508 standards](#) due to the complexity of the information being presented. If you need assistance accessing journal content, please contact [ehp508@niehs.nih.gov](mailto:ehp508@niehs.nih.gov). Our staff will work with you to assess and meet your accessibility needs within 3 working days.

### **Supplemental Material**

#### **A Permutation Test-Based Approach to Strengthening Inference on the Effects of Environmental Mixtures: Comparison between Single-Index Analytic Methods**

Drew B. Day, Sheela Sathyanarayana, Kaja Z. LeWinn, Catherine J. Karr, W. Alex Mason, and Adam A. Szpiro

#### **Table of Contents**

##### **Additional Information about Bootstrap Weighted Quantile Sum Regressions (WQSBS)**

##### **TIDES Correlation Matrix**

##### **Confidence Interval Coverage Results from Simulations**

##### **Rates of WQsr Models Failing to Estimate a Coefficient in the Desired Direction**

**Table S1.** Covariates Included in the CANDLE Models and their Times of Collection and Categorizations.

**Table S2.** Numbers of Failed WQS Models and Failed Internal Iterations for Iterative WQS Models by Correlation and True Mixture Coefficient Value without the “b1\_constr” Constraint.

**Table S3.** Mixture Coefficients, Confidence Intervals, and p-values from Models Associating Prenatal Maternal Phthalate Mixtures with Female Child Age 4-6 FSIQ in the CANDLE Cohort with or without the “b1\_constr” Parameter.

**Table S4.** Numbers of Failed WQS Models and Failed Internal Iterations for Iterative WQS Models by Correlation and True Mixture Coefficient Value with the “b1\_constr” Constraint.

**Figure S1.** Comparing Bootstrapped b1 Values from the WQSBS\_Split Model with “b1\_constr” Set to True or False.

**Figure S2.** Pearson Correlation Coefficients between 10 Specific Gravity-Adjusted, log10-Transformed Maternal Urinary Phthalate Metabolites and 10 Covariates in the TIDES Study.

**Figure S3.** Pearson Correlation Coefficients between  $\log_{10}$ -transformed Maternal Third Trimester Urinary Phthalate Metabolites in the CANDLE Study.

**Figure S4.** Confidence Interval Coverage Rates for Mixture Coefficient Estimates in 500 Simulations for Nonzero or Zero Mixture Coefficients Between Correlation Conditions.

**Figure S5.** Model Performance Measures for Mixture Coefficient Estimates in 500 Simulations for Nonzero or Zero Mixture Coefficients Between Correlation Conditions when the “b1\_constr” Constraint was Set to be True.

**Figure S6.** MAPE for High and Low Mixture Weight Estimates Rescaled as Component-Specific Coefficients in 500 Simulations for Nonzero Mixture Coefficients Between Correlation Conditions when the “b1\_constr” Constraint was Set to be True.

**Figure S7.** Mixture Coefficient and Component Coefficient Results for All Models Evaluating Associations between Prenatal Maternal Phthalate Mixtures and Female Child FSIQ in the CANDLE Cohort when the “b1\_constr” Constraint was Set to be True.

## References
